# Supplementary material for: Credible evidence for the passivation effect of remnant PbI2 in CH3NH3PbI3 films in improving the performance of perovskite solar cells
Source: Royal Society of Chemistry journal article supplement (doi:10.1039/c5nr08344c), 2016-01-01
Supplement: c5nr08344c1.pdf [file c5nr08344c1.pdf]

Supplementary Materials

**The credible evidence for passivation effect of remnant  $\text{PbI}_2$  in  $\text{CH}_3\text{NH}_3\text{PbI}_3$  films for improving the performance of perovskite solar cells**

Shimao Wang,<sup>a,b</sup> Weiwei Dong,<sup>\*a,b</sup> Xiaodong Fang,<sup>\*a,b,c</sup> Qingli Zhang,<sup>a</sup> Shu Zhou,<sup>a</sup> Zanhong Deng,<sup>a,b</sup> Ruhua Tao,<sup>a,b</sup> Jingzhen Shao,<sup>a,b</sup> Rui Xia,<sup>a</sup> Chao Song,<sup>a</sup> Linhua Hu<sup>b</sup> and Jun Zhu<sup>b</sup>

<sup>a</sup> Anhui Provincial Key Laboratory of Photonic Devices and Materials, Anhui Institute of Optics and Fine Mechanics, Chinese Academy of Sciences, Hefei 230031, P. R. China

<sup>b</sup> Key Laboratory of Novel Thin Film Solar Cells, Chinese Academy of Sciences, Hefei 230031, P. R. China

<sup>c</sup> School of Environmental Science and Optoelectronic Technology, University of Science and Technology of China, Hefei 230026, P. R. China

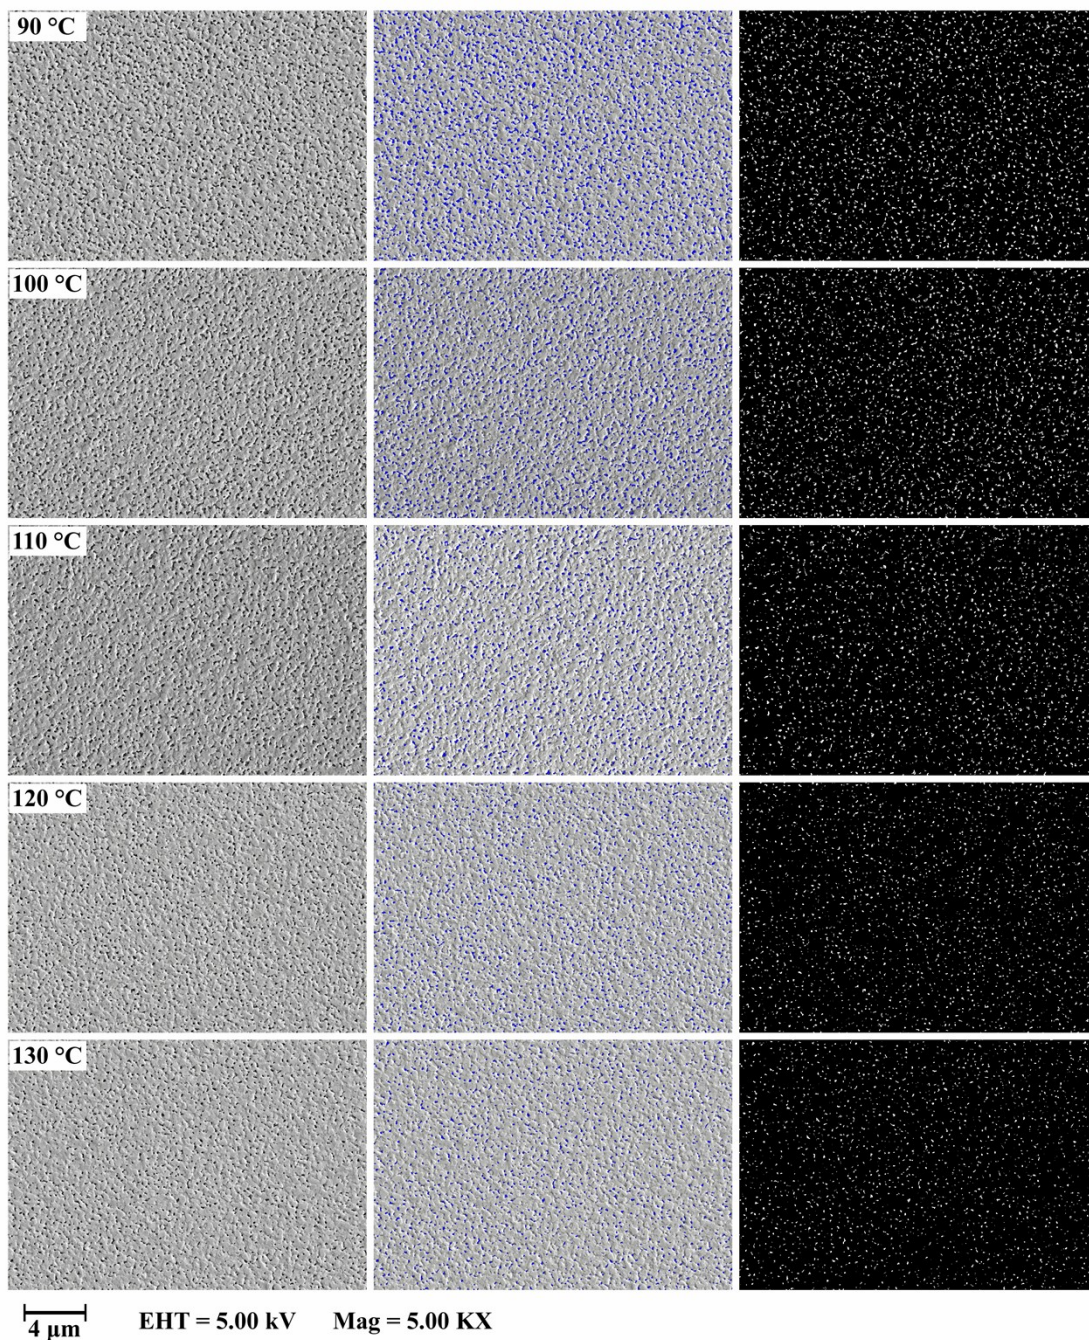

**Fig. S1** FE-SEM images and binarized FE-SEM images of the  $\text{PbI}_2$  films prepared at different temperature. The magnification is 5000 $\times$ .

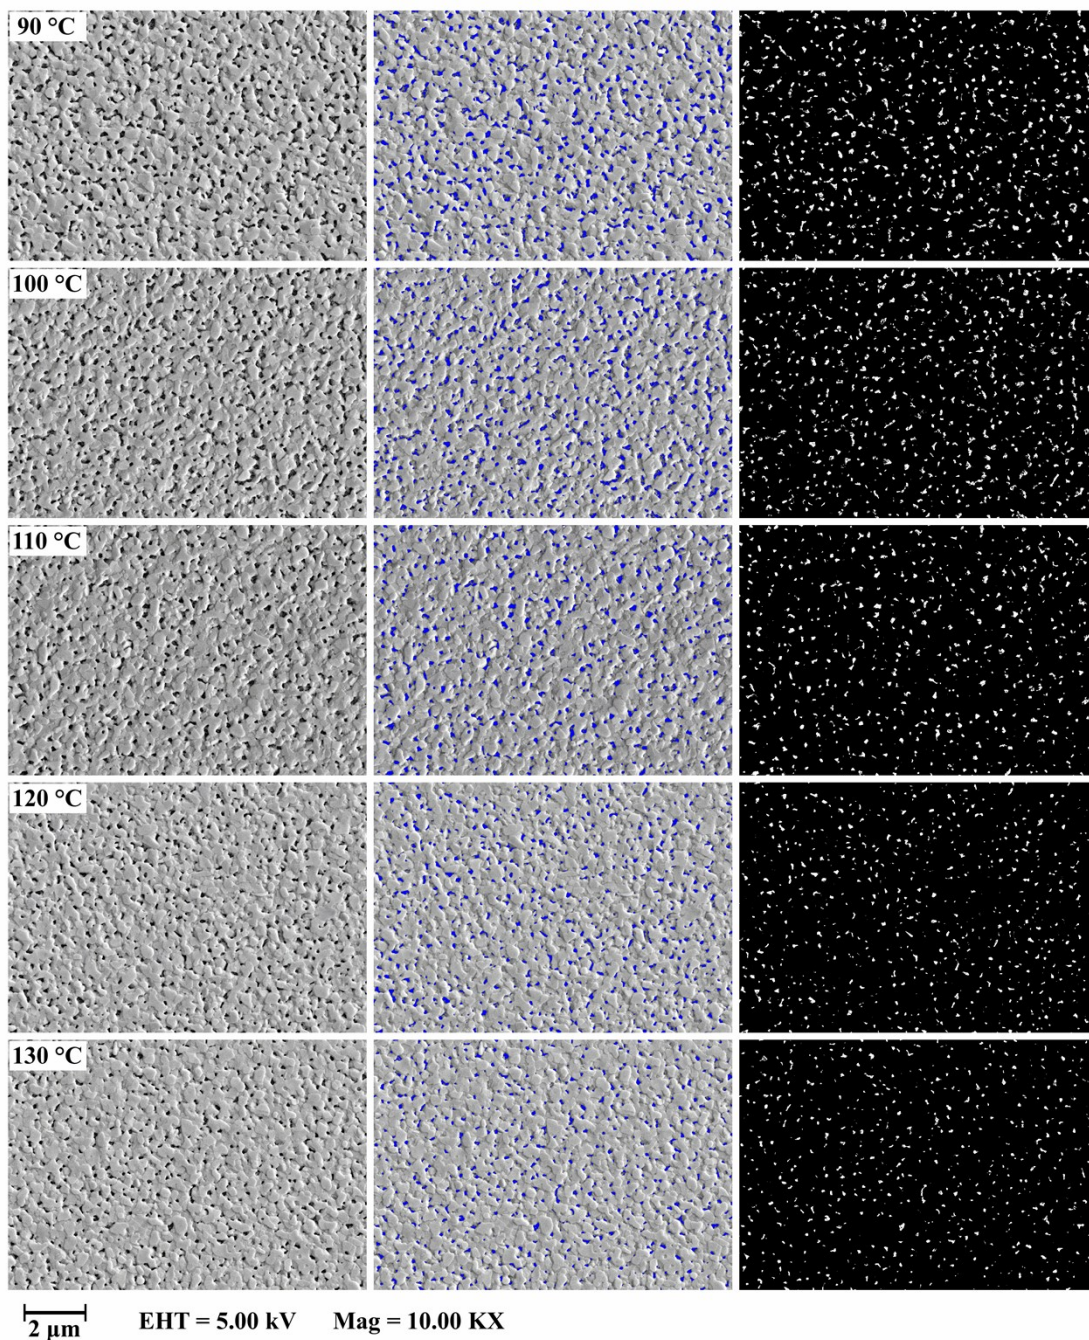

**Fig. S2** FE-SEM images and binarized FE-SEM images of the  $\text{PbI}_2$  films prepared at different temperature. The magnification is 10000 $\times$ .

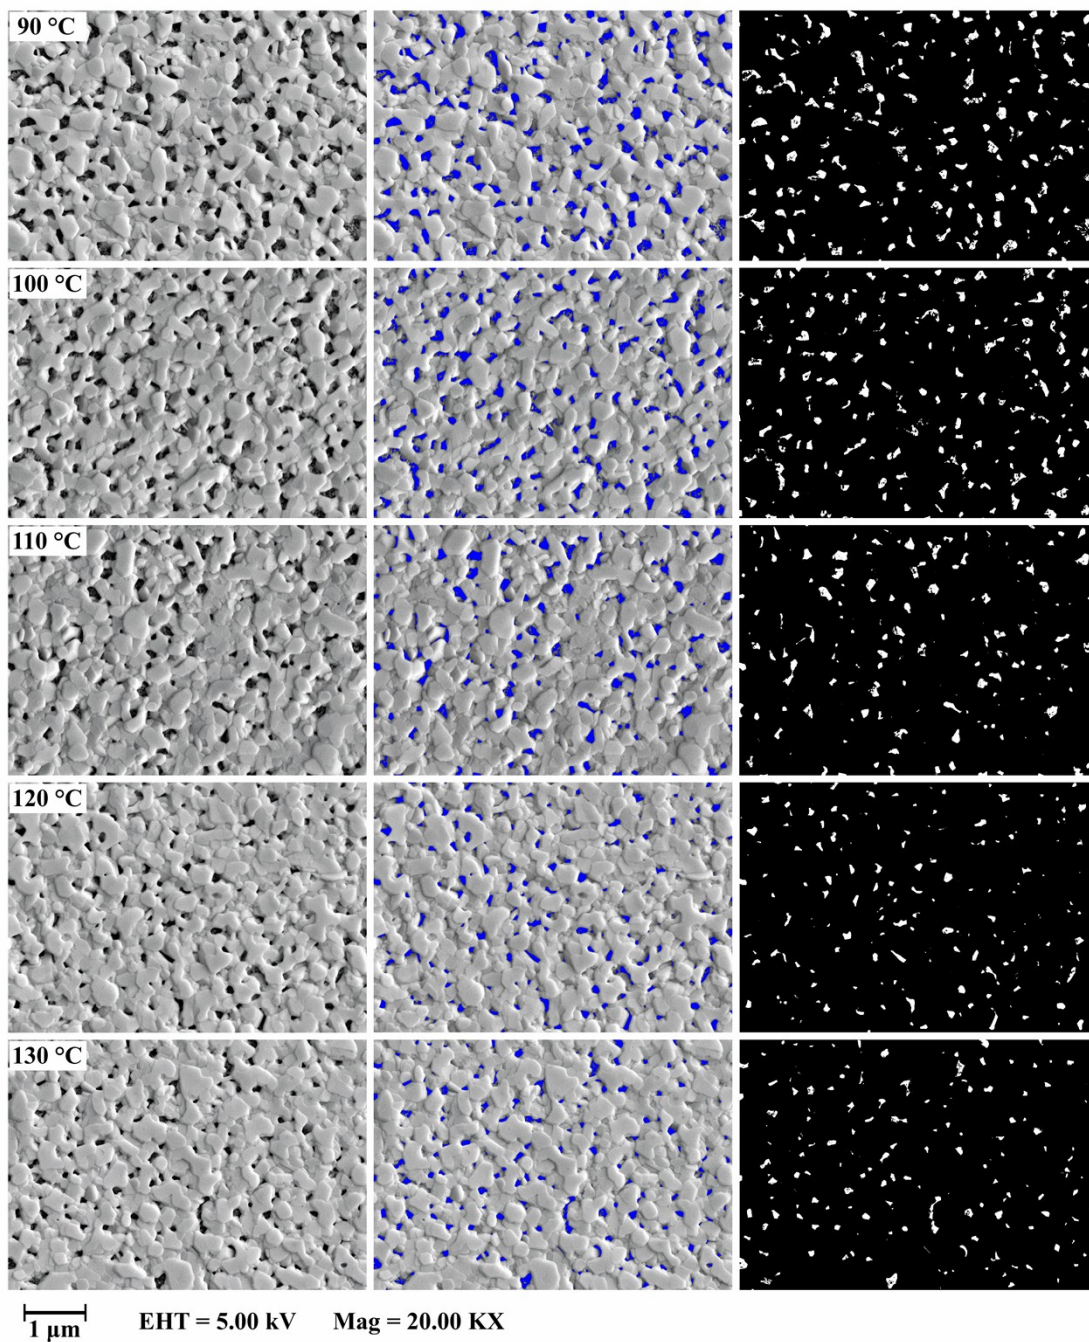

**Fig. S3** FE-SEM images and binarized FE-SEM images of the  $\text{PbI}_2$  films prepared at different temperature. The magnification is 20000 $\times$ .
